# Supplementary material
Source: Royal Society of Chemistry journal article supplement (doi:10.1039/d6ta01617k)
Supplement: d6ta01617k1.pdf [file d6ta01617k1.pdf]

## Supporting Information

# Flash Joule Heating Enabled Instantaneous Purification and Strengthening of CNT Films for High-Performance Flexible Aluminum-Ion Batteries

Jianmin Feng, Yue Wu\*, Xuan Song, Jiahan Ma, Xiaoyu Yu, Ziqi Luo, Lei Dong, Yan Han,

Conglai Long, Dejun Li\*

*College of Physics and Materials Science, Tianjin Normal University, Tianjin 300387, China*

*Department of Chemical Engineering, Tsinghua University, Beijing 100084, China*

\* Corresponding author. Email addresses: yuewu\_0429@163.com (Y. Wu)

\* Corresponding author. Email addresses: dejunli@mail.tjnu.edu.cn (D. Li)

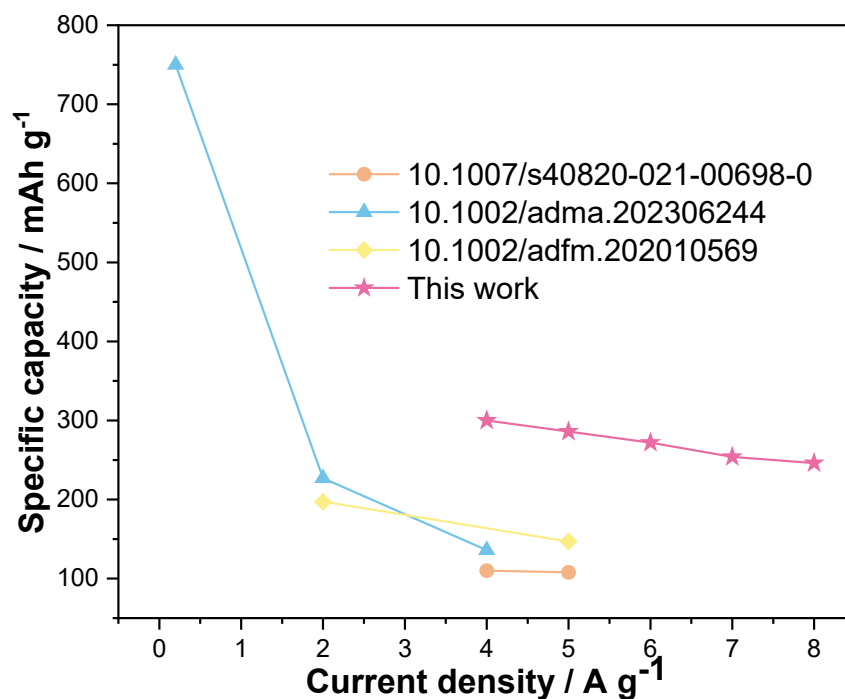

**Fig.S1** The specific capacities of CNTF-1700 and typical RABs cathodes were compared.

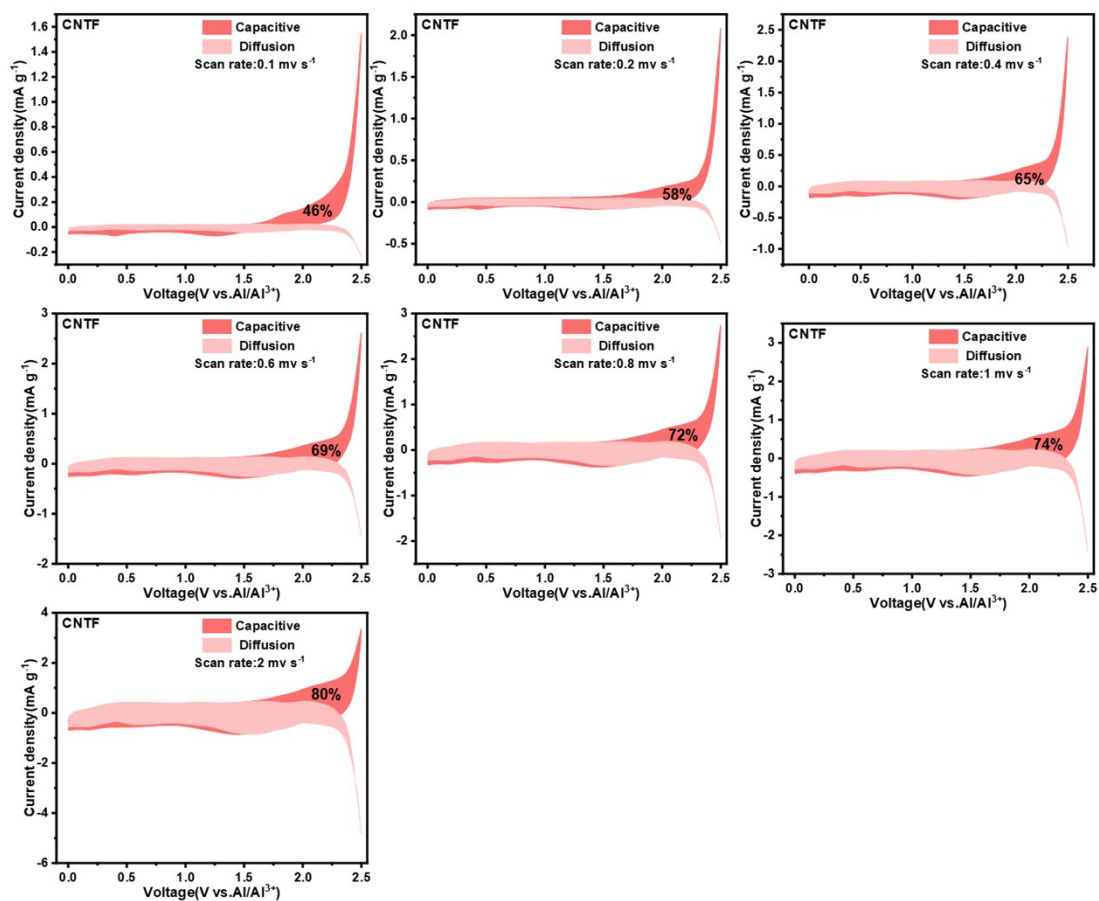

**Fig.S2** The pseudocapacitance contribution of CNTF electrode at different scan rates in AIBs.

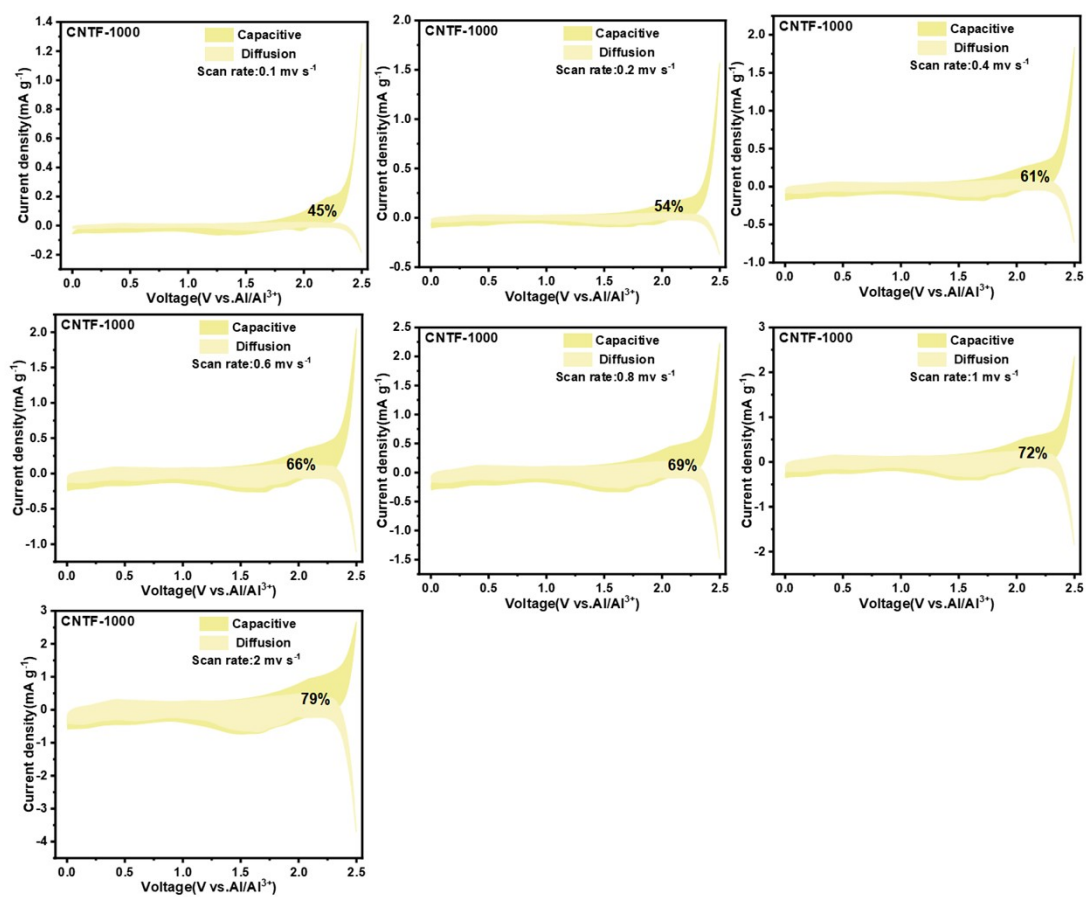

**Fig.S3** The pseudocapacitance contribution of CNTF-1000 electrode at different scan rates in AIBs.

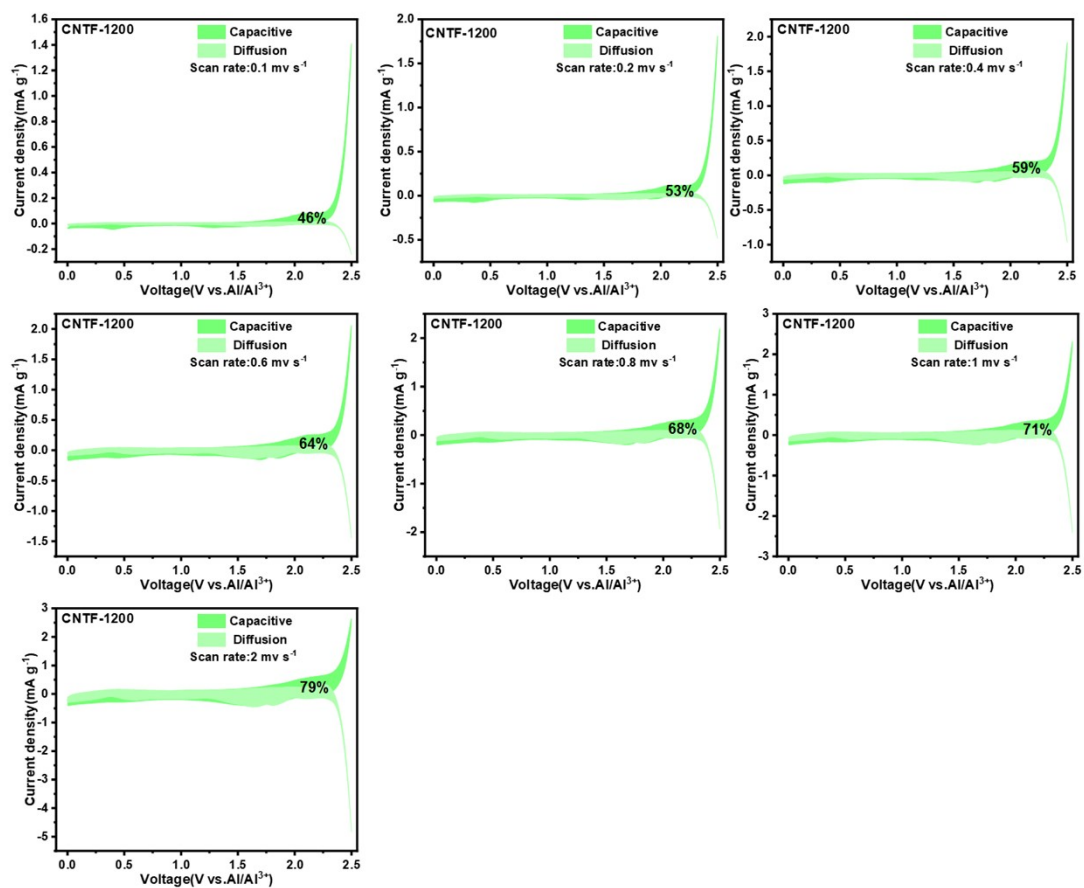

**Fig.S4** The pseudocapacitance contribution of CNTF-1200 electrode at different scan rates in AIBs.

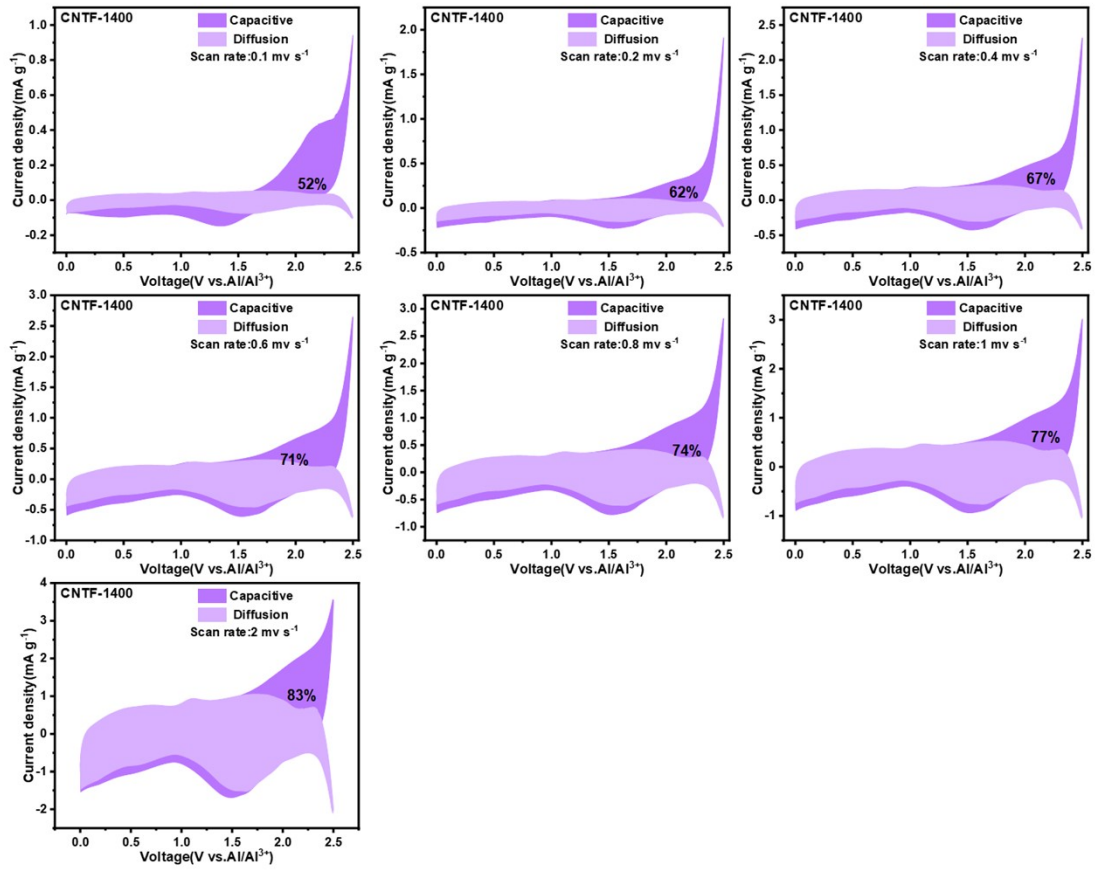

**Fig.S5** The pseudocapacitance contribution of CNTF-1400 electrode at different scan rates in AIBs.

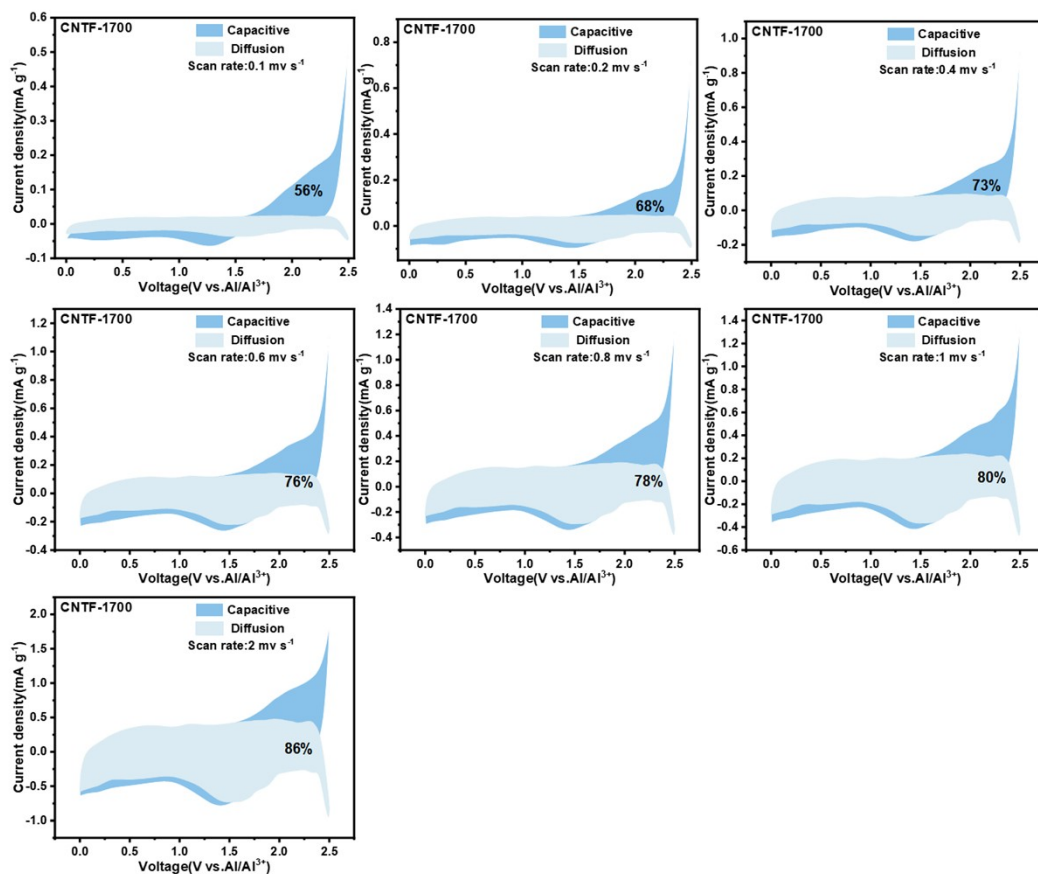

**Fig.S6** The pseudocapacitance contribution of CNTF-1700 electrode at different scan rates in AIBs.

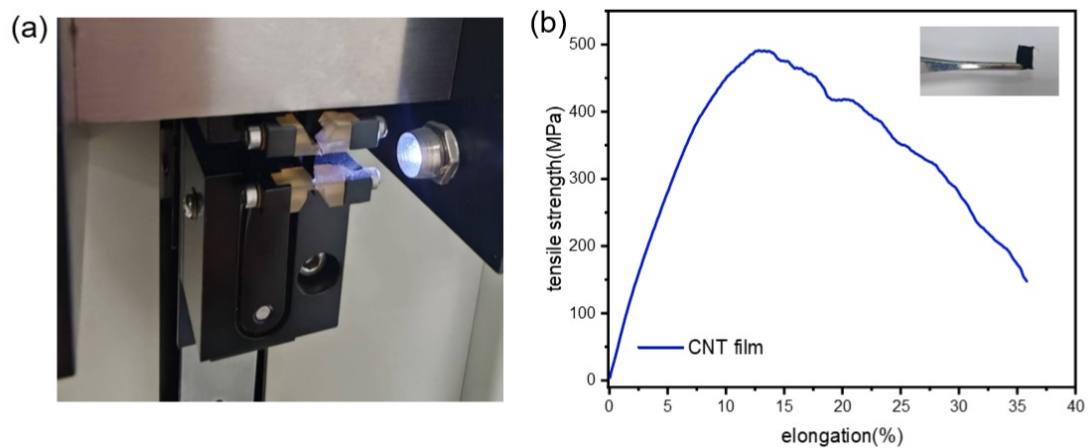

**Fig.S7** (a) The carbon nanotube film is stretched using a drawing apparatus. (b) Tensile curve.

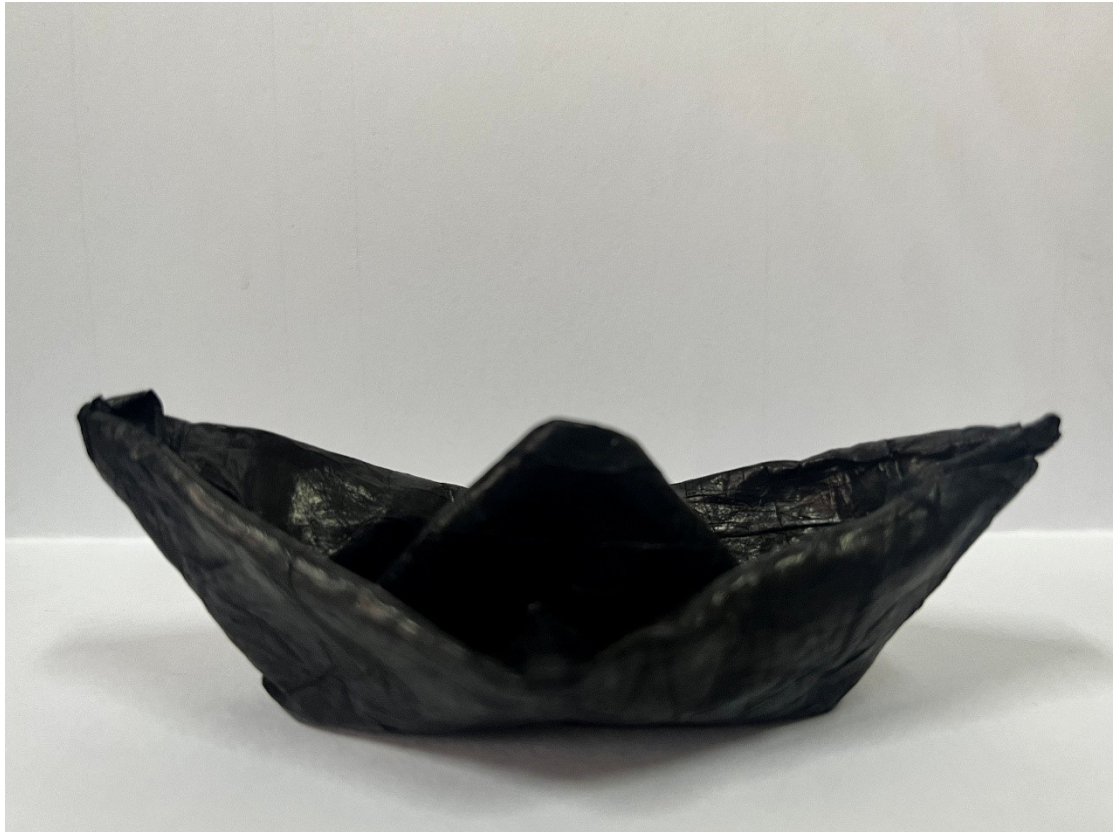

**Fig.S8** The carbon nanotube film is folded into a boat.

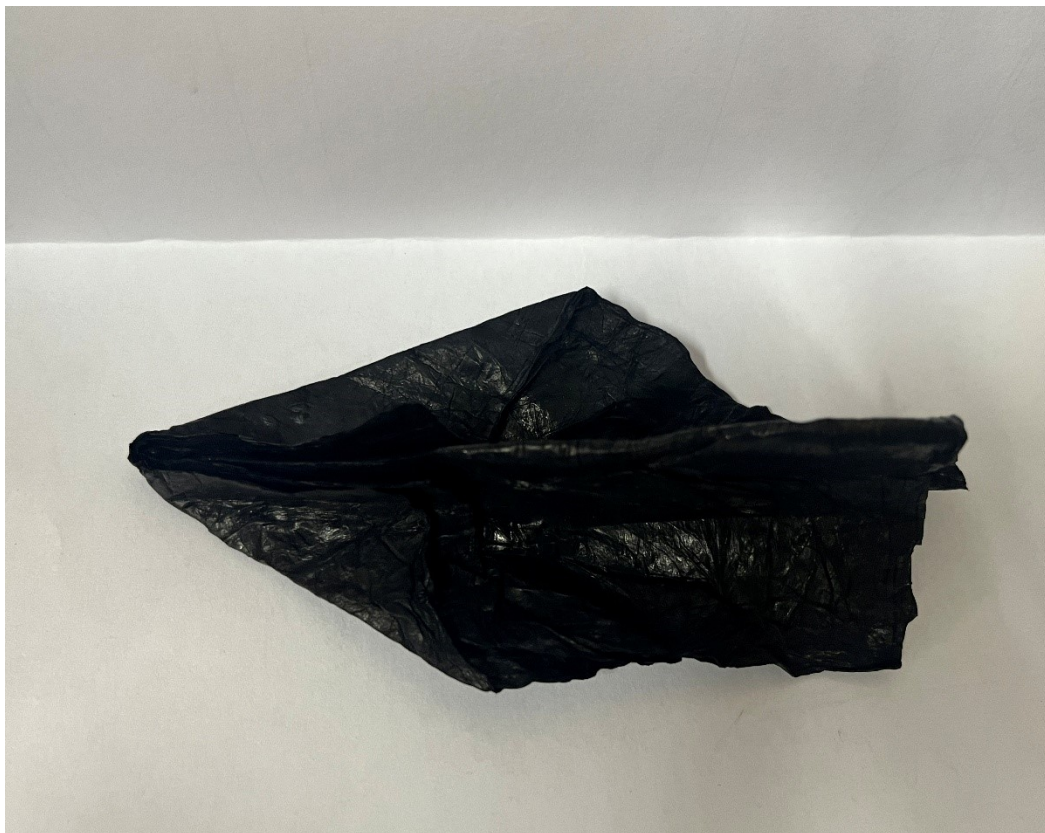

**Fig.S9** The carbon nanotube film is folded into an aircraft.

Table S1 Quantitative results of EDS mapping for elemental quantification

| Element Weight/% | CNTF  | CNTF-1000 | CNTF-1200 | CNTF -1400 | CNTF-1700 |
|------------------|-------|-----------|-----------|------------|-----------|
| C                | 84.61 | 90.60     | 91.21     | 97.82      | 96.03     |
| O                | 4.08  | 2.28      | 2.50      | 1.82       | 3.80      |
| Fe               | 11.31 | 7.12      | 6.29      | 0.36       | 0.18      |

Table S2 Relative content of C and O elements in CNTF, CNTF-1000, CNTF-1200, CNTF-1400 and CNTF-1700 samples in XPS test

| Element Weight/% | CNTF  | CNTF-1000 | CNTF-1200 | CNTF -1400 | CNTF-1700 |
|------------------|-------|-----------|-----------|------------|-----------|
| C                | 96.01 | 97.62     | 98.52     | 99.05      | 99.38     |
| O                | 3.99  | 2.38      | 1.48      | 0.95       | 0.62      |
| Total volume     | 100   | 100       | 100       | 100        | 100       |

Table S3 The C 1s peak fitting curve of all samples is about the ratio of sp<sup>2</sup> / sp<sup>3</sup>

|                                        | CNTF  | CNTF-1000 | CNTF-1200 | CNTF-1400 | CNTF-1700 |
|----------------------------------------|-------|-----------|-----------|-----------|-----------|
| sp <sup>2</sup> (Area)                 | 98910 | 104866    | 99418     | 111800    | 124630    |
| sp <sup>3</sup> (Area)                 | 77055 | 77884     | 64932     | 65750     | 53235     |
| sp <sup>2</sup> /sp <sup>3</sup> ratio | 1.28  | 1.35      | 1.53      | 1.70      | 2.34      |

Table S4 The change of C-O peak position and full width at half maximum (FWHM) in O1s XPS spectra.

|                   | CNTF   | CNTF-1000 | CNTF-1200 | CNTF-1400 | CNTF-1700 |
|-------------------|--------|-----------|-----------|-----------|-----------|
| Peak Position(eV) | 533.55 | 533.45    | 533.74    | 533.74    | 533.32    |
| FWHM (eV)         | 2.03   | 2.19      | 2.96      | 3.01      | 2.67      |
